# Supplementary material
Source: Springer Nature journal article supplement (https://www.springermedizin.de/resource/supplementary/12877_2013_988_MOESM2_ESM.pdf/9440860)

# Evening assessment

■ Fail   ■ Pass   ■ Pass with distinction   ■ Pass with great distinction

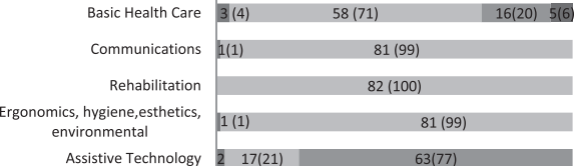

Supplement: MOESM2 [file 9440860]
